# Supplementary material
Source: publisher figshare collection journal article supplement (https://acs.figshare.com/ndownloader/files/4513564)
Supplement: Supplementary file 1 [file 4513564]

  
data_r80326e 
  
_audit_creation_method            SHELXL-97 
_chemical_name_systematic 
; 
 ? 
; 
_chemical_name_common             ? 
_chemical_melting_point           ? 
_chemical_formula_moiety          ? 
_chemical_formula_sum 
 'C19 H18 O5' 
_chemical_formula_weight          326.33 
  
loop_ 
 _atom_type_symbol 
 _atom_type_description 
 _atom_type_scat_dispersion_real 
 _atom_type_scat_dispersion_imag 
 _atom_type_scat_source 
 'C'  'C'   0.0033   0.0016 
 'International Tables Vol C Tables 4.2.6.8 and 6.1.1.4' 
 'H'  'H'   0.0000   0.0000 
 'International Tables Vol C Tables 4.2.6.8 and 6.1.1.4' 
 'O'  'O'   0.0106   0.0060 
 'International Tables Vol C Tables 4.2.6.8 and 6.1.1.4' 
  
_symmetry_cell_setting            Monoclinic 
_symmetry_space_group_name_H-M    P2(1)/c 
  
loop_ 
 _symmetry_equiv_pos_as_xyz 
 'x, y, z' 
 '-x, y+1/2, -z+1/2' 
 '-x, -y, -z' 
 'x, -y-1/2, z-1/2' 
  
_cell_length_a                    9.5067(19) 
_cell_length_b                    19.416(4) 
_cell_length_c                    17.540(4) 
_cell_angle_alpha                 90.00 
_cell_angle_beta                  104.01(3) 
_cell_angle_gamma                 90.00 
_cell_volume                      3141.3(11) 
_cell_formula_units_Z             8 
_cell_measurement_temperature     113(2) 
_cell_measurement_reflns_used     5018 
_cell_measurement_theta_min       1.591 
_cell_measurement_theta_max       27.079 
  
_exptl_crystal_description        ? 
_exptl_crystal_colour             ? 
_exptl_crystal_size_max           0.12 
_exptl_crystal_size_mid           0.10 
_exptl_crystal_size_min           0.08 
_exptl_crystal_density_meas       ? 
_exptl_crystal_density_diffrn     1.380 
_exptl_crystal_density_method     'not measured' 
_exptl_crystal_F_000              1376 
_exptl_absorpt_coefficient_mu     0.100 
_exptl_absorpt_correction_type    MULTI-SCAN 
_exptl_absorpt_correction_T_min   0.9881 
_exptl_absorpt_correction_T_max   0.9921 
_exptl_absorpt_process_details    crystalclear 
  
_exptl_special_details 
; 
 ? 
; 
  
_diffrn_ambient_temperature       113(2) 
_diffrn_radiation_wavelength      0.71073 
_diffrn_radiation_type            MoK\a 
_diffrn_radiation_source          'rotating anode' 
_diffrn_radiation_monochromator   confocal 
_diffrn_measurement_device_type   'rigaku saturn' 
_diffrn_measurement_method        '\w scans' 
_diffrn_detector_area_resol_mean  ? 
_diffrn_standards_number          0 
_diffrn_standards_interval_count  0 
_diffrn_standards_interval_time   0 
_diffrn_standards_decay_%         0 
_diffrn_reflns_number             18129 
_diffrn_reflns_av_R_equivalents   0.0630 
_diffrn_reflns_av_sigmaI/netI     0.0685 
_diffrn_reflns_limit_h_min        -11 
_diffrn_reflns_limit_h_max        9 
_diffrn_reflns_limit_k_min        -23 
_diffrn_reflns_limit_k_max        20 
_diffrn_reflns_limit_l_min        -20 
_diffrn_reflns_limit_l_max        16 
_diffrn_reflns_theta_min          1.59 
_diffrn_reflns_theta_max          25.02 
_reflns_number_total              5546 
_reflns_number_gt                 4073 
_reflns_threshold_expression      >2sigma(I) 
  
_computing_data_collection        'crystalclear' 
_computing_cell_refinement        'crystalclear' 
_computing_data_reduction         'crystalclear' 
_computing_structure_solution     'SHELXS-97 (Sheldrick, 1990)' 
_computing_structure_refinement   'SHELXL-97 (Sheldrick, 1997)' 
_computing_molecular_graphics     'Bruker SHELXTL' 
_computing_publication_material   'Bruker SHELXTL' 
  
_refine_special_details 
; 
 Refinement of F^2^ against ALL reflections.  The weighted R-factor wR and 
 goodness of fit S are based on F^2^, conventional R-factors R are based 
 on F, with F set to zero for negative F^2^. The threshold expression of 
 F^2^ > 2sigma(F^2^) is used only for calculating R-factors(gt) etc. and is 
 not relevant to the choice of reflections for refinement.  R-factors based 
 on F^2^ are statistically about twice as large as those based on F, and R- 
 factors based on ALL data will be even larger. 
; 
  
_refine_ls_structure_factor_coef  Fsqd 
_refine_ls_matrix_type            full 
_refine_ls_weighting_scheme       calc 
_refine_ls_weighting_details 
 'calc w=1/[\s^2^(Fo^2^)+(0.0727P)^2^+0.1960P] where P=(Fo^2^+2Fc^2^)/3' 
_atom_sites_solution_primary      direct 
_atom_sites_solution_secondary    difmap 
_atom_sites_solution_hydrogens    geom 
_refine_ls_hydrogen_treatment     CONSTR 
_refine_ls_extinction_method      none 
_refine_ls_extinction_coef        ? 
_refine_ls_number_reflns          5546 
_refine_ls_number_parameters      439 
_refine_ls_number_restraints      0 
_refine_ls_R_factor_all           0.0891 
_refine_ls_R_factor_gt            0.0599 
_refine_ls_wR_factor_ref          0.1522 
_refine_ls_wR_factor_gt           0.1362 
_refine_ls_goodness_of_fit_ref    1.063 
_refine_ls_restrained_S_all       1.063 
_refine_ls_shift/su_max           0.000 
_refine_ls_shift/su_mean          0.000 
  
loop_ 
 _atom_site_label 
 _atom_site_type_symbol 
 _atom_site_fract_x 
 _atom_site_fract_y 
 _atom_site_fract_z 
 _atom_site_U_iso_or_equiv 
 _atom_site_adp_type 
 _atom_site_occupancy 
 _atom_site_symmetry_multiplicity 
 _atom_site_calc_flag 
 _atom_site_refinement_flags 
 _atom_site_disorder_assembly 
 _atom_site_disorder_group 
O1 O 0.21895(19) 0.52654(7) 0.18274(9) 0.0225(4) Uani 1 1 d . . . 
O2 O 0.1736(2) 0.63007(8) -0.07481(9) 0.0284(4) Uani 1 1 d . . . 
O3 O 0.3835(2) 0.71143(8) -0.01378(9) 0.0256(4) Uani 1 1 d . . . 
O4 O 0.5793(2) 0.67889(8) 0.27654(9) 0.0256(4) Uani 1 1 d . . . 
O5 O 0.5275(2) 0.62215(8) 0.37804(10) 0.0289(4) Uani 1 1 d . . . 
O6 O 0.29123(19) 0.48006(7) 0.81322(9) 0.0213(4) Uani 1 1 d . . . 
O7 O 0.3175(2) 0.37886(8) 1.07021(9) 0.0280(4) Uani 1 1 d . . . 
O8 O 0.1200(2) 0.29365(8) 1.00587(9) 0.0258(4) Uani 1 1 d . . . 
O9 O -0.0761(2) 0.33280(8) 0.71543(9) 0.0257(4) Uani 1 1 d . . . 
O10 O -0.0074(2) 0.38059(8) 0.61431(10) 0.0346(5) Uani 1 1 d . . . 
C1 C 0.3147(3) 0.54059(11) 0.25354(13) 0.0209(5) Uani 1 1 d . . . 
C2 C 0.4046(3) 0.59401(11) 0.24551(13) 0.0203(5) Uani 1 1 d . . . 
C3 C 0.3635(3) 0.61403(11) 0.16341(13) 0.0207(5) Uani 1 1 d . . . 
C4 C 0.2497(3) 0.57203(11) 0.12845(13) 0.0208(6) Uani 1 1 d . . . 
C5 C 0.1798(3) 0.57356(11) 0.04940(14) 0.0223(6) Uani 1 1 d . . . 
H5 H 0.1038 0.5438 0.0281 0.027 Uiso 1 1 calc R . . 
C6 C 0.2292(3) 0.62153(11) 0.00395(13) 0.0223(6) Uani 1 1 d . . . 
C7 C 0.3459(3) 0.66615(11) 0.03797(14) 0.0213(6) Uani 1 1 d . . . 
C8 C 0.4131(3) 0.66340(11) 0.11652(14) 0.0215(5) Uani 1 1 d . . . 
H8 H 0.4889 0.6931 0.1383 0.026 Uiso 1 1 calc R . . 
C9 C 0.0497(3) 0.59012(12) -0.11078(15) 0.0286(6) Uani 1 1 d . . . 
H9A H 0.0747 0.5421 -0.1070 0.043 Uiso 1 1 calc R . . 
H9B H 0.0170 0.6029 -0.1651 0.043 Uiso 1 1 calc R . . 
H9C H -0.0263 0.5984 -0.0845 0.043 Uiso 1 1 calc R . . 
C10 C 0.4972(3) 0.75885(11) 0.01837(14) 0.0250(6) Uani 1 1 d . . . 
H10A H 0.4719 0.7849 0.0596 0.037 Uiso 1 1 calc R . . 
H10B H 0.5108 0.7896 -0.0221 0.037 Uiso 1 1 calc R . . 
H10C H 0.5854 0.7340 0.0392 0.037 Uiso 1 1 calc R . . 
C11 C 0.5092(3) 0.63032(11) 0.30785(14) 0.0222(6) Uani 1 1 d . . . 
C12 C 0.6770(3) 0.72357(12) 0.33160(15) 0.0300(6) Uani 1 1 d . . . 
H12A H 0.7534 0.6967 0.3652 0.036 Uiso 1 1 calc R . . 
H12B H 0.6245 0.7478 0.3644 0.036 Uiso 1 1 calc R . . 
C13 C 0.7400(3) 0.77376(13) 0.28412(17) 0.0381(7) Uani 1 1 d . . . 
H13A H 0.7894 0.7491 0.2509 0.057 Uiso 1 1 calc R . . 
H13B H 0.8073 0.8034 0.3187 0.057 Uiso 1 1 calc R . . 
H13C H 0.6636 0.8010 0.2523 0.057 Uiso 1 1 calc R . . 
C14 C 0.2986(3) 0.49432(11) 0.31702(14) 0.0214(6) Uani 1 1 d . . . 
C15 C 0.4168(3) 0.47773(11) 0.37943(14) 0.0229(6) Uani 1 1 d . . . 
H15 H 0.5072 0.4972 0.3821 0.028 Uiso 1 1 calc R . . 
C16 C 0.3980(3) 0.43228(11) 0.43700(14) 0.0239(6) Uani 1 1 d . . . 
H16 H 0.4764 0.4218 0.4786 0.029 Uiso 1 1 calc R . . 
C17 C 0.2649(3) 0.40224(12) 0.43372(14) 0.0249(6) Uani 1 1 d . . . 
H17 H 0.2541 0.3714 0.4725 0.030 Uiso 1 1 calc R . . 
C18 C 0.1478(3) 0.41834(11) 0.37227(15) 0.0265(6) Uani 1 1 d . . . 
H18 H 0.0578 0.3985 0.3699 0.032 Uiso 1 1 calc R . . 
C19 C 0.1642(3) 0.46398(11) 0.31420(14) 0.0256(6) Uani 1 1 d . . . 
H19 H 0.0851 0.4745 0.2731 0.031 Uiso 1 1 calc R . . 
C20 C 0.2047(3) 0.46347(11) 0.74051(13) 0.0206(5) Uani 1 1 d . . . 
C21 C 0.1169(3) 0.40802(11) 0.74677(13) 0.0204(5) Uani 1 1 d . . . 
C22 C 0.1506(3) 0.38981(11) 0.82928(13) 0.0204(5) Uani 1 1 d . . . 
C23 C 0.2570(3) 0.43451(11) 0.86665(13) 0.0210(6) Uani 1 1 d . . . 
C24 C 0.3202(3) 0.43506(11) 0.94633(14) 0.0218(5) Uani 1 1 d . . . 
H24 H 0.3925 0.4663 0.9687 0.026 Uiso 1 1 calc R . . 
C25 C 0.2696(3) 0.38625(11) 0.99115(13) 0.0211(5) Uani 1 1 d . . . 
C26 C 0.1594(3) 0.33910(11) 0.95490(14) 0.0212(5) Uani 1 1 d . . . 
C27 C 0.0998(3) 0.34031(11) 0.87497(14) 0.0218(5) Uani 1 1 d . . . 
H27 H 0.0278 0.3092 0.8518 0.026 Uiso 1 1 calc R . . 
C28 C 0.4407(3) 0.41817(12) 1.10874(15) 0.0275(6) Uani 1 1 d . . . 
H28A H 0.5217 0.4064 1.0875 0.041 Uiso 1 1 calc R . . 
H28B H 0.4639 0.4082 1.1640 0.041 Uiso 1 1 calc R . . 
H28C H 0.4195 0.4663 1.1007 0.041 Uiso 1 1 calc R . . 
C29 C 0.0140(3) 0.24314(12) 0.97223(15) 0.0271(6) Uani 1 1 d . . . 
H29A H -0.0760 0.2656 0.9486 0.041 Uiso 1 1 calc R . . 
H29B H 0.0001 0.2123 1.0126 0.041 Uiso 1 1 calc R . . 
H29C H 0.0467 0.2176 0.9329 0.041 Uiso 1 1 calc R . . 
C30 C 0.0077(3) 0.37479(11) 0.68464(14) 0.0231(6) Uani 1 1 d . . . 
C31 C -0.1837(3) 0.29355(12) 0.65934(14) 0.0263(6) Uani 1 1 d . . . 
H31A H -0.1390 0.2699 0.6225 0.032 Uiso 1 1 calc R . . 
H31B H -0.2589 0.3238 0.6301 0.032 Uiso 1 1 calc R . . 
C32 C -0.2466(3) 0.24254(12) 0.70610(15) 0.0305(6) Uani 1 1 d . . . 
H32A H -0.1719 0.2117 0.7329 0.046 Uiso 1 1 calc R . . 
H32B H -0.3218 0.2167 0.6715 0.046 Uiso 1 1 calc R . . 
H32C H -0.2864 0.2665 0.7439 0.046 Uiso 1 1 calc R . . 
C33 C 0.2179(3) 0.51186(11) 0.67840(13) 0.0210(5) Uani 1 1 d . . . 
C34 C 0.1839(3) 0.49493(12) 0.59858(14) 0.0240(6) Uani 1 1 d . . . 
H34 H 0.1564 0.4501 0.5830 0.029 Uiso 1 1 calc R . . 
C35 C 0.1908(3) 0.54395(12) 0.54260(14) 0.0250(6) Uani 1 1 d . . . 
H35 H 0.1659 0.5322 0.4896 0.030 Uiso 1 1 calc R . . 
C36 C 0.2345(3) 0.61044(12) 0.56473(14) 0.0249(6) Uani 1 1 d . . . 
H36 H 0.2381 0.6434 0.5268 0.030 Uiso 1 1 calc R . . 
C37 C 0.2727(3) 0.62771(11) 0.64310(14) 0.0261(6) Uani 1 1 d . . . 
H37 H 0.3049 0.6721 0.6581 0.031 Uiso 1 1 calc R . . 
C38 C 0.2636(3) 0.57937(11) 0.69979(15) 0.0244(6) Uani 1 1 d . . . 
H38 H 0.2880 0.5918 0.7526 0.029 Uiso 1 1 calc R . . 
  
loop_ 
 _atom_site_aniso_label 
 _atom_site_aniso_U_11 
 _atom_site_aniso_U_22 
 _atom_site_aniso_U_33 
 _atom_site_aniso_U_23 
 _atom_site_aniso_U_13 
 _atom_site_aniso_U_12 
O1 0.0229(11) 0.0242(8) 0.0189(9) 0.0016(7) 0.0023(8) -0.0017(7) 
O2 0.0330(13) 0.0330(9) 0.0159(9) 0.0005(8) -0.0006(8) -0.0067(8) 
O3 0.0292(12) 0.0279(9) 0.0178(9) 0.0041(7) 0.0018(8) -0.0066(7) 
O4 0.0266(12) 0.0280(9) 0.0210(9) -0.0022(7) 0.0034(8) -0.0077(8) 
O5 0.0369(13) 0.0297(9) 0.0178(9) 0.0000(8) 0.0022(8) -0.0051(8) 
O6 0.0215(11) 0.0247(8) 0.0159(9) 0.0024(7) 0.0010(7) -0.0017(7) 
O7 0.0293(12) 0.0330(9) 0.0183(9) 0.0012(8) -0.0010(8) -0.0079(8) 
O8 0.0299(12) 0.0265(8) 0.0201(9) 0.0014(7) 0.0043(8) -0.0072(7) 
O9 0.0264(12) 0.0312(9) 0.0181(9) -0.0051(7) 0.0025(8) -0.0095(8) 
O10 0.0458(14) 0.0362(10) 0.0180(10) -0.0003(8) 0.0007(9) -0.0153(9) 
C1 0.0229(16) 0.0221(11) 0.0161(12) -0.0014(10) 0.0015(11) 0.0033(10) 
C2 0.0226(16) 0.0199(11) 0.0170(12) 0.0001(10) 0.0023(11) 0.0026(10) 
C3 0.0214(16) 0.0206(11) 0.0200(13) -0.0022(10) 0.0047(11) 0.0034(10) 
C4 0.0232(16) 0.0193(11) 0.0191(13) 0.0007(10) 0.0037(11) 0.0007(10) 
C5 0.0218(16) 0.0214(11) 0.0215(13) -0.0041(10) 0.0012(11) -0.0038(10) 
C6 0.0241(16) 0.0252(12) 0.0157(12) -0.0004(10) 0.0014(11) 0.0050(10) 
C7 0.0225(16) 0.0206(11) 0.0213(13) 0.0022(10) 0.0064(11) 0.0019(10) 
C8 0.0227(16) 0.0199(11) 0.0212(13) -0.0024(10) 0.0039(11) -0.0008(10) 
C9 0.0289(18) 0.0308(13) 0.0227(14) -0.0016(11) -0.0003(12) 0.0003(11) 
C10 0.0259(17) 0.0241(12) 0.0249(14) 0.0016(11) 0.0061(11) -0.0024(11) 
C11 0.0227(16) 0.0201(12) 0.0241(14) -0.0002(10) 0.0061(11) 0.0033(10) 
C12 0.0282(18) 0.0322(13) 0.0274(14) -0.0087(11) 0.0026(12) -0.0087(11) 
C13 0.042(2) 0.0368(15) 0.0382(17) -0.0115(13) 0.0144(15) -0.0144(13) 
C14 0.0243(16) 0.0195(11) 0.0207(13) 0.0001(10) 0.0060(11) 0.0051(10) 
C15 0.0187(16) 0.0237(12) 0.0271(14) 0.0013(11) 0.0069(11) 0.0011(10) 
C16 0.0230(16) 0.0241(12) 0.0221(13) -0.0003(10) 0.0006(11) 0.0010(10) 
C17 0.0252(17) 0.0264(12) 0.0237(14) 0.0034(11) 0.0070(12) -0.0002(11) 
C18 0.0220(17) 0.0248(12) 0.0333(15) 0.0033(11) 0.0081(12) -0.0036(11) 
C19 0.0233(17) 0.0270(12) 0.0252(14) -0.0025(11) 0.0034(11) 0.0031(11) 
C20 0.0203(16) 0.0221(11) 0.0179(12) -0.0022(10) 0.0015(10) 0.0025(10) 
C21 0.0206(16) 0.0214(11) 0.0168(12) -0.0021(10) -0.0001(11) 0.0010(10) 
C22 0.0201(15) 0.0216(11) 0.0189(12) -0.0013(10) 0.0033(11) 0.0046(10) 
C23 0.0224(16) 0.0210(11) 0.0193(13) 0.0001(10) 0.0046(11) 0.0019(10) 
C24 0.0192(15) 0.0240(12) 0.0199(13) -0.0040(10) 0.0002(11) -0.0020(10) 
C25 0.0205(16) 0.0267(12) 0.0148(12) -0.0007(10) 0.0016(10) 0.0030(10) 
C26 0.0226(16) 0.0207(11) 0.0199(13) 0.0003(10) 0.0039(11) 0.0000(10) 
C27 0.0220(16) 0.0186(11) 0.0240(13) -0.0020(10) 0.0040(11) -0.0001(10) 
C28 0.0250(17) 0.0323(13) 0.0225(14) -0.0023(11) 0.0003(12) -0.0021(11) 
C29 0.0265(17) 0.0256(12) 0.0277(14) 0.0013(11) 0.0039(12) -0.0045(11) 
C30 0.0262(17) 0.0213(12) 0.0206(13) 0.0005(10) 0.0035(11) 0.0017(10) 
C31 0.0260(17) 0.0285(13) 0.0216(13) -0.0040(11) 0.0001(11) -0.0063(11) 
C32 0.0325(19) 0.0309(13) 0.0276(14) -0.0022(12) 0.0061(13) -0.0042(12) 
C33 0.0167(15) 0.0250(12) 0.0210(13) 0.0008(10) 0.0044(11) 0.0027(10) 
C34 0.0196(16) 0.0265(12) 0.0262(14) -0.0009(11) 0.0061(12) 0.0026(10) 
C35 0.0235(16) 0.0313(13) 0.0197(13) 0.0021(11) 0.0045(11) 0.0013(11) 
C36 0.0225(16) 0.0285(12) 0.0239(13) 0.0058(11) 0.0059(11) 0.0028(11) 
C37 0.0277(17) 0.0236(12) 0.0270(14) 0.0000(11) 0.0067(12) -0.0005(11) 
C38 0.0239(17) 0.0274(12) 0.0219(13) 0.0005(11) 0.0054(11) -0.0004(11) 
  
_geom_special_details 
; 
 All esds (except the esd in the dihedral angle between two l.s. planes) 
 are estimated using the full covariance matrix.  The cell esds are taken 
 into account individually in the estimation of esds in distances, angles 
 and torsion angles; correlations between esds in cell parameters are only 
 used when they are defined by crystal symmetry.  An approximate (isotropic) 
 treatment of cell esds is used for estimating esds involving l.s. planes. 
; 
  
loop_ 
 _geom_bond_atom_site_label_1 
 _geom_bond_atom_site_label_2 
 _geom_bond_distance 
 _geom_bond_site_symmetry_2 
 _geom_bond_publ_flag 
O1 C1 1.378(3) . ? 
O1 C4 1.381(3) . ? 
O2 C6 1.364(3) . ? 
O2 C9 1.424(3) . ? 
O3 C7 1.372(3) . ? 
O3 C10 1.428(3) . ? 
O4 C11 1.346(3) . ? 
O4 C12 1.454(3) . ? 
O5 C11 1.211(3) . ? 
O6 C20 1.378(3) . ? 
O6 C23 1.383(3) . ? 
O7 C25 1.358(3) . ? 
O7 C28 1.424(3) . ? 
O8 C26 1.371(3) . ? 
O8 C29 1.427(3) . ? 
O9 C30 1.342(3) . ? 
O9 C31 1.452(3) . ? 
O10 C30 1.212(3) . ? 
C1 C2 1.373(3) . ? 
C1 C14 1.467(3) . ? 
C2 C3 1.451(3) . ? 
C2 C11 1.468(4) . ? 
C3 C4 1.375(3) . ? 
C3 C8 1.416(3) . ? 
C4 C5 1.385(3) . ? 
C5 C6 1.380(3) . ? 
C5 H5 0.9300 . ? 
C6 C7 1.420(4) . ? 
C7 C8 1.372(3) . ? 
C8 H8 0.9300 . ? 
C9 H9A 0.9600 . ? 
C9 H9B 0.9600 . ? 
C9 H9C 0.9600 . ? 
C10 H10A 0.9600 . ? 
C10 H10B 0.9600 . ? 
C10 H10C 0.9600 . ? 
C12 C13 1.498(3) . ? 
C12 H12A 0.9700 . ? 
C12 H12B 0.9700 . ? 
C13 H13A 0.9600 . ? 
C13 H13B 0.9600 . ? 
C13 H13C 0.9600 . ? 
C14 C19 1.397(4) . ? 
C14 C15 1.403(4) . ? 
C15 C16 1.385(3) . ? 
C15 H15 0.9300 . ? 
C16 C17 1.382(4) . ? 
C16 H16 0.9300 . ? 
C17 C18 1.385(4) . ? 
C17 H17 0.9300 . ? 
C18 C19 1.387(3) . ? 
C18 H18 0.9300 . ? 
C19 H19 0.9300 . ? 
C20 C21 1.383(3) . ? 
C20 C33 1.467(3) . ? 
C21 C22 1.448(3) . ? 
C21 C30 1.461(4) . ? 
C22 C23 1.373(3) . ? 
C22 C27 1.410(3) . ? 
C23 C24 1.381(3) . ? 
C24 C25 1.389(3) . ? 
C24 H24 0.9300 . ? 
C25 C26 1.421(3) . ? 
C26 C27 1.379(3) . ? 
C27 H27 0.9300 . ? 
C28 H28A 0.9600 . ? 
C28 H28B 0.9600 . ? 
C28 H28C 0.9600 . ? 
C29 H29A 0.9600 . ? 
C29 H29B 0.9600 . ? 
C29 H29C 0.9600 . ? 
C31 C32 1.499(3) . ? 
C31 H31A 0.9700 . ? 
C31 H31B 0.9700 . ? 
C32 H32A 0.9600 . ? 
C32 H32B 0.9600 . ? 
C32 H32C 0.9600 . ? 
C33 C34 1.398(3) . ? 
C33 C38 1.403(3) . ? 
C34 C35 1.380(3) . ? 
C34 H34 0.9300 . ? 
C35 C36 1.383(3) . ? 
C35 H35 0.9300 . ? 
C36 C37 1.376(3) . ? 
C36 H36 0.9300 . ? 
C37 C38 1.385(3) . ? 
C37 H37 0.9300 . ? 
C38 H38 0.9300 . ? 
  
loop_ 
 _geom_angle_atom_site_label_1 
 _geom_angle_atom_site_label_2 
 _geom_angle_atom_site_label_3 
 _geom_angle 
 _geom_angle_site_symmetry_1 
 _geom_angle_site_symmetry_3 
 _geom_angle_publ_flag 
C1 O1 C4 106.92(18) . . ? 
C6 O2 C9 117.29(19) . . ? 
C7 O3 C10 116.47(18) . . ? 
C11 O4 C12 116.53(18) . . ? 
C20 O6 C23 106.97(18) . . ? 
C25 O7 C28 117.50(19) . . ? 
C26 O8 C29 116.70(18) . . ? 
C30 O9 C31 115.85(18) . . ? 
C2 C1 O1 110.43(19) . . ? 
C2 C1 C14 136.2(2) . . ? 
O1 C1 C14 113.3(2) . . ? 
C1 C2 C3 106.2(2) . . ? 
C1 C2 C11 127.8(2) . . ? 
C3 C2 C11 125.6(2) . . ? 
C4 C3 C8 118.6(2) . . ? 
C4 C3 C2 106.1(2) . . ? 
C8 C3 C2 135.3(2) . . ? 
C3 C4 O1 110.3(2) . . ? 
C3 C4 C5 124.6(2) . . ? 
O1 C4 C5 125.0(2) . . ? 
C6 C5 C4 116.4(2) . . ? 
C6 C5 H5 121.8 . . ? 
C4 C5 H5 121.8 . . ? 
O2 C6 C5 124.4(2) . . ? 
O2 C6 C7 115.0(2) . . ? 
C5 C6 C7 120.6(2) . . ? 
O3 C7 C8 123.8(2) . . ? 
O3 C7 C6 114.5(2) . . ? 
C8 C7 C6 121.6(2) . . ? 
C7 C8 C3 118.0(2) . . ? 
C7 C8 H8 121.0 . . ? 
C3 C8 H8 121.0 . . ? 
O2 C9 H9A 109.5 . . ? 
O2 C9 H9B 109.5 . . ? 
H9A C9 H9B 109.5 . . ? 
O2 C9 H9C 109.5 . . ? 
H9A C9 H9C 109.5 . . ? 
H9B C9 H9C 109.5 . . ? 
O3 C10 H10A 109.5 . . ? 
O3 C10 H10B 109.5 . . ? 
H10A C10 H10B 109.5 . . ? 
O3 C10 H10C 109.5 . . ? 
H10A C10 H10C 109.5 . . ? 
H10B C10 H10C 109.5 . . ? 
O5 C11 O4 122.9(2) . . ? 
O5 C11 C2 126.8(2) . . ? 
O4 C11 C2 110.2(2) . . ? 
O4 C12 C13 107.2(2) . . ? 
O4 C12 H12A 110.3 . . ? 
C13 C12 H12A 110.3 . . ? 
O4 C12 H12B 110.3 . . ? 
C13 C12 H12B 110.3 . . ? 
H12A C12 H12B 108.5 . . ? 
C12 C13 H13A 109.5 . . ? 
C12 C13 H13B 109.5 . . ? 
H13A C13 H13B 109.5 . . ? 
C12 C13 H13C 109.5 . . ? 
H13A C13 H13C 109.5 . . ? 
H13B C13 H13C 109.5 . . ? 
C19 C14 C15 118.9(2) . . ? 
C19 C14 C1 119.6(2) . . ? 
C15 C14 C1 121.5(2) . . ? 
C16 C15 C14 119.7(2) . . ? 
C16 C15 H15 120.1 . . ? 
C14 C15 H15 120.1 . . ? 
C17 C16 C15 121.1(3) . . ? 
C17 C16 H16 119.4 . . ? 
C15 C16 H16 119.4 . . ? 
C16 C17 C18 119.5(2) . . ? 
C16 C17 H17 120.2 . . ? 
C18 C17 H17 120.2 . . ? 
C17 C18 C19 120.2(3) . . ? 
C17 C18 H18 119.9 . . ? 
C19 C18 H18 119.9 . . ? 
C18 C19 C14 120.5(3) . . ? 
C18 C19 H19 119.7 . . ? 
C14 C19 H19 119.7 . . ? 
O6 C20 C21 110.19(19) . . ? 
O6 C20 C33 113.5(2) . . ? 
C21 C20 C33 136.0(2) . . ? 
C20 C21 C22 106.1(2) . . ? 
C20 C21 C30 128.2(2) . . ? 
C22 C21 C30 125.7(2) . . ? 
C23 C22 C27 118.3(2) . . ? 
C23 C22 C21 106.4(2) . . ? 
C27 C22 C21 135.3(2) . . ? 
C22 C23 C24 125.3(2) . . ? 
C22 C23 O6 110.3(2) . . ? 
C24 C23 O6 124.4(2) . . ? 
C23 C24 C25 116.2(2) . . ? 
C23 C24 H24 121.9 . . ? 
C25 C24 H24 121.9 . . ? 
O7 C25 C24 125.0(2) . . ? 
O7 C25 C26 114.7(2) . . ? 
C24 C25 C26 120.3(2) . . ? 
O8 C26 C27 124.3(2) . . ? 
O8 C26 C25 114.3(2) . . ? 
C27 C26 C25 121.4(2) . . ? 
C26 C27 C22 118.5(2) . . ? 
C26 C27 H27 120.8 . . ? 
C22 C27 H27 120.8 . . ? 
O7 C28 H28A 109.5 . . ? 
O7 C28 H28B 109.5 . . ? 
H28A C28 H28B 109.5 . . ? 
O7 C28 H28C 109.5 . . ? 
H28A C28 H28C 109.5 . . ? 
H28B C28 H28C 109.5 . . ? 
O8 C29 H29A 109.5 . . ? 
O8 C29 H29B 109.5 . . ? 
H29A C29 H29B 109.5 . . ? 
O8 C29 H29C 109.5 . . ? 
H29A C29 H29C 109.5 . . ? 
H29B C29 H29C 109.5 . . ? 
O10 C30 O9 122.0(2) . . ? 
O10 C30 C21 127.3(2) . . ? 
O9 C30 C21 110.6(2) . . ? 
O9 C31 C32 106.55(19) . . ? 
O9 C31 H31A 110.4 . . ? 
C32 C31 H31A 110.4 . . ? 
O9 C31 H31B 110.4 . . ? 
C32 C31 H31B 110.4 . . ? 
H31A C31 H31B 108.6 . . ? 
C31 C32 H32A 109.5 . . ? 
C31 C32 H32B 109.5 . . ? 
H32A C32 H32B 109.5 . . ? 
C31 C32 H32C 109.5 . . ? 
H32A C32 H32C 109.5 . . ? 
H32B C32 H32C 109.5 . . ? 
C34 C33 C38 118.0(2) . . ? 
C34 C33 C20 123.6(2) . . ? 
C38 C33 C20 118.5(2) . . ? 
C35 C34 C33 120.7(2) . . ? 
C35 C34 H34 119.6 . . ? 
C33 C34 H34 119.6 . . ? 
C34 C35 C36 120.4(2) . . ? 
C34 C35 H35 119.8 . . ? 
C36 C35 H35 119.8 . . ? 
C37 C36 C35 119.8(2) . . ? 
C37 C36 H36 120.1 . . ? 
C35 C36 H36 120.1 . . ? 
C36 C37 C38 120.3(2) . . ? 
C36 C37 H37 119.8 . . ? 
C38 C37 H37 119.8 . . ? 
C37 C38 C33 120.7(2) . . ? 
C37 C38 H38 119.7 . . ? 
C33 C38 H38 119.7 . . ? 
  
loop_ 
 _geom_torsion_atom_site_label_1 
 _geom_torsion_atom_site_label_2 
 _geom_torsion_atom_site_label_3 
 _geom_torsion_atom_site_label_4 
 _geom_torsion 
 _geom_torsion_site_symmetry_1 
 _geom_torsion_site_symmetry_2 
 _geom_torsion_site_symmetry_3 
 _geom_torsion_site_symmetry_4 
 _geom_torsion_publ_flag 
C4 O1 C1 C2 0.3(2) . . . . ? 
C4 O1 C1 C14 -177.94(19) . . . . ? 
O1 C1 C2 C3 -1.0(3) . . . . ? 
C14 C1 C2 C3 176.7(3) . . . . ? 
O1 C1 C2 C11 171.9(2) . . . . ? 
C14 C1 C2 C11 -10.4(5) . . . . ? 
C1 C2 C3 C4 1.2(3) . . . . ? 
C11 C2 C3 C4 -171.9(2) . . . . ? 
C1 C2 C3 C8 -178.5(3) . . . . ? 
C11 C2 C3 C8 8.4(4) . . . . ? 
C8 C3 C4 O1 178.69(19) . . . . ? 
C2 C3 C4 O1 -1.1(3) . . . . ? 
C8 C3 C4 C5 1.0(4) . . . . ? 
C2 C3 C4 C5 -178.8(2) . . . . ? 
C1 O1 C4 C3 0.5(3) . . . . ? 
C1 O1 C4 C5 178.2(2) . . . . ? 
C3 C4 C5 C6 -0.6(4) . . . . ? 
O1 C4 C5 C6 -178.0(2) . . . . ? 
C9 O2 C6 C5 4.8(3) . . . . ? 
C9 O2 C6 C7 -175.5(2) . . . . ? 
C4 C5 C6 O2 179.8(2) . . . . ? 
C4 C5 C6 C7 0.2(3) . . . . ? 
C10 O3 C7 C8 -1.6(3) . . . . ? 
C10 O3 C7 C6 178.0(2) . . . . ? 
O2 C6 C7 O3 0.6(3) . . . . ? 
C5 C6 C7 O3 -179.8(2) . . . . ? 
O2 C6 C7 C8 -179.8(2) . . . . ? 
C5 C6 C7 C8 -0.1(4) . . . . ? 
O3 C7 C8 C3 -179.9(2) . . . . ? 
C6 C7 C8 C3 0.5(3) . . . . ? 
C4 C3 C8 C7 -0.9(3) . . . . ? 
C2 C3 C8 C7 178.8(2) . . . . ? 
C12 O4 C11 O5 -1.8(3) . . . . ? 
C12 O4 C11 C2 174.4(2) . . . . ? 
C1 C2 C11 O5 -5.1(4) . . . . ? 
C3 C2 C11 O5 166.5(2) . . . . ? 
C1 C2 C11 O4 178.8(2) . . . . ? 
C3 C2 C11 O4 -9.6(3) . . . . ? 
C11 O4 C12 C13 -179.0(2) . . . . ? 
C2 C1 C14 C19 155.0(3) . . . . ? 
O1 C1 C14 C19 -27.3(3) . . . . ? 
C2 C1 C14 C15 -27.3(4) . . . . ? 
O1 C1 C14 C15 150.4(2) . . . . ? 
C19 C14 C15 C16 -0.4(3) . . . . ? 
C1 C14 C15 C16 -178.1(2) . . . . ? 
C14 C15 C16 C17 0.7(3) . . . . ? 
C15 C16 C17 C18 -0.7(3) . . . . ? 
C16 C17 C18 C19 0.4(4) . . . . ? 
C17 C18 C19 C14 -0.1(3) . . . . ? 
C15 C14 C19 C18 0.2(3) . . . . ? 
C1 C14 C19 C18 177.9(2) . . . . ? 
C23 O6 C20 C21 -0.4(3) . . . . ? 
C23 O6 C20 C33 174.20(19) . . . . ? 
O6 C20 C21 C22 0.8(3) . . . . ? 
C33 C20 C21 C22 -172.1(3) . . . . ? 
O6 C20 C21 C30 178.8(2) . . . . ? 
C33 C20 C21 C30 6.0(5) . . . . ? 
C20 C21 C22 C23 -0.9(3) . . . . ? 
C30 C21 C22 C23 -179.0(2) . . . . ? 
C20 C21 C22 C27 178.5(3) . . . . ? 
C30 C21 C22 C27 0.4(4) . . . . ? 
C27 C22 C23 C24 0.3(4) . . . . ? 
C21 C22 C23 C24 179.8(2) . . . . ? 
C27 C22 C23 O6 -178.80(19) . . . . ? 
C21 C22 C23 O6 0.7(3) . . . . ? 
C20 O6 C23 C22 -0.2(2) . . . . ? 
C20 O6 C23 C24 -179.3(2) . . . . ? 
C22 C23 C24 C25 -0.4(4) . . . . ? 
O6 C23 C24 C25 178.6(2) . . . . ? 
C28 O7 C25 C24 -8.2(3) . . . . ? 
C28 O7 C25 C26 171.9(2) . . . . ? 
C23 C24 C25 O7 -179.7(2) . . . . ? 
C23 C24 C25 C26 0.2(3) . . . . ? 
C29 O8 C26 C27 2.4(3) . . . . ? 
C29 O8 C26 C25 -177.4(2) . . . . ? 
O7 C25 C26 O8 -0.3(3) . . . . ? 
C24 C25 C26 O8 179.8(2) . . . . ? 
O7 C25 C26 C27 179.9(2) . . . . ? 
C24 C25 C26 C27 0.0(4) . . . . ? 
O8 C26 C27 C22 -179.9(2) . . . . ? 
C25 C26 C27 C22 -0.1(4) . . . . ? 
C23 C22 C27 C26 0.0(3) . . . . ? 
C21 C22 C27 C26 -179.3(2) . . . . ? 
C31 O9 C30 O10 1.4(3) . . . . ? 
C31 O9 C30 C21 -176.5(2) . . . . ? 
C20 C21 C30 O10 15.4(4) . . . . ? 
C22 C21 C30 O10 -166.9(2) . . . . ? 
C20 C21 C30 O9 -166.8(2) . . . . ? 
C22 C21 C30 O9 10.9(3) . . . . ? 
C30 O9 C31 C32 170.8(2) . . . . ? 
O6 C20 C33 C34 156.9(2) . . . . ? 
C21 C20 C33 C34 -30.4(4) . . . . ? 
O6 C20 C33 C38 -24.8(3) . . . . ? 
C21 C20 C33 C38 147.9(3) . . . . ? 
C38 C33 C34 C35 -2.1(4) . . . . ? 
C20 C33 C34 C35 176.3(2) . . . . ? 
C33 C34 C35 C36 1.4(4) . . . . ? 
C34 C35 C36 C37 0.6(4) . . . . ? 
C35 C36 C37 C38 -1.9(4) . . . . ? 
C36 C37 C38 C33 1.2(4) . . . . ? 
C34 C33 C38 C37 0.8(4) . . . . ? 
C20 C33 C38 C37 -177.6(2) . . . . ? 
  
_diffrn_measured_fraction_theta_max    0.999 
_diffrn_reflns_theta_full              25.02 
_diffrn_measured_fraction_theta_full   0.999 
_refine_diff_density_max    0.211 
_refine_diff_density_min   -0.232 
_refine_diff_density_rms    0.053 
